# Supplementary material for: Enhancing Soluble Expression of Phospholipase B for Efficient Catalytic Synthesis of L-Alpha-Glycerylphosphorylcholine
Source: MDPI journal article supplement (doi:10.3390/catal12060650), 2022-06-13
Supplement: s1 [file s1]

## Supplementary Material

### Enhancing Soluble Expression of Phospholipase B for Efficient Catalytic Synthesis of L-Alpha-Glycerolphosphorylcholine

**Table S1.** Protein concentration and the percent of soluble PLB protein.

| Molecular chaperones            | Free | GroELS | DnaKJE and GroELS | Tf    | GroELS and Tf | DnaKJE |
|---------------------------------|------|--------|-------------------|-------|---------------|--------|
| Protein concentration (mg/mL)   | 3.66 | 5.05   | 3.98              | 3.91  | 4.89          | 4.61   |
| The % of solubility PLB protein | 3.1% | 13.0%  | 10.7%             | 14.4% | 8.6%          | 16.6%  |

The percent of soluble PLB protein was calculated by dividing the amount of soluble PLB protein by the total amount of protein.

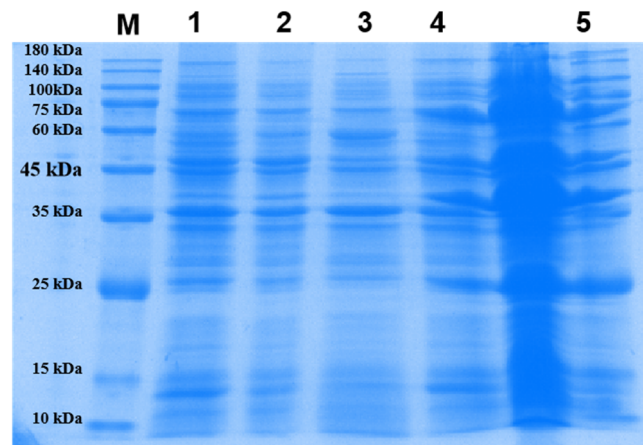

**Figure S1.** SDS-PAGE analysis of the supernatant of recombinant strains containing chaperone plasmids; lane M is protein molecular weight marker. Lane 1 is the supernatant of *E. coli* BL21(DE3)/pET28a-PLB-pGro7. Lane 2 is the supernatant of *E. coli* BL21(DE3)/pET28a-PLB-pG-KJE8. Lane 3 is the supernatant of *E. coli* BL21(DE3)/pET28a-PLB-pTf16. Lane 4 is the supernatant of *E. coli* BL21(DE3)/pET28a-PLB-pG-Tf2. Lane 5 is the supernatant of *E. coli* BL21(DE3)/pET28a-PLB-pKJE7.

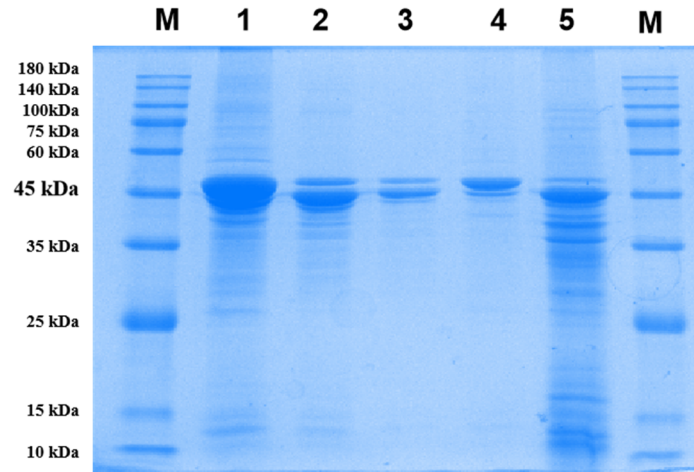

**Figure S2.** SDS-PAGE analysis of the precipitation of recombinant strains containing chaperone plasmids; lane M is protein molecular weight marker. Lane 1 is the precipitation of *E. coli* BL21(DE3)/pET28a-PLB-pGro7. Lane 2 is the precipitation of *E. coli* BL21(DE3)/pET28a-PLB-pG-KJE8. Lane 3 is the precipitation of *E. coli* BL21(DE3)/pET28a-PLB-pTf16. Lane 4 is the precipitation of *E. coli* BL21(DE3)/pET28a-PLB-pG-Tf2. Lane 5 is the precipitation of *E. coli* BL21(DE3)/pET28a-PLB-pKJE7.

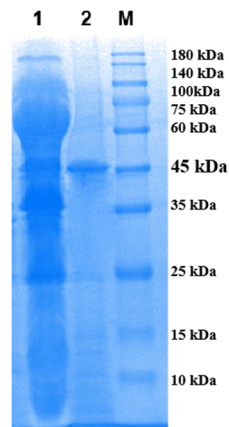

**Figure S3.** SDS-PAGE analysis of purified PLB; lane M is protein molecular weight marker. Lane 1 and 2 are respectively crude enzyme of *E. coli* BL21(DE3)/pET28a-PLB-pKJE7 and eluted protein.
